# Supplementary material for: Construction of three new Co(ii)-organic frameworks based on diverse metal clusters: highly selective C2H2 and CO2 capture and magnetic properties
Source: Royal Society of Chemistry journal article supplement (doi:10.1039/d1ce00180a), 2021-01-01
Supplement: d1ce00180a1.pdf [file d1ce00180a1.pdf]

Electronic Supporting Information

# Construction of three new Co(II)-organic frameworks based on diverse metal clusters :highly selective C<sub>2</sub>H<sub>2</sub> and CO<sub>2</sub> capture and magnetic properties

Xian-Feng Sun,<sup>a</sup> Jing-Jing Chen,<sup>a</sup> Dan Gao,<sup>a</sup> Li-Na Zheng,<sup>\*a</sup> Bin Liu,<sup>a</sup> Bo Liu,<sup>b</sup> and Tao Ding<sup>\*a</sup>

<sup>a</sup>*School of Environmental and Chemical Engineering, Xi'an Polytechnic University, Xi'an 710048, P. R. China.*

<sup>b</sup>*College of Chemistry & Pharmacy, Northwest A&F University, Yangling, 712100, P. R. China*

**Table S1. Selected Bond Length (Å) and Angles (°) for 1-3**

| <b>1</b>            |            |                     |            |
|---------------------|------------|---------------------|------------|
| Co(1)-O(1)          | 2.086(3)   | Co(1)-O(2)          | 2.054(3)   |
| Co(1)-O(4)          | 2.153(5)   | Co(1)-O(5)#2        | 2.098(4)   |
| Co(1)-O(6)#3        | 2.093(4)   | Co(1)-N(1)#4        | 2.202(4)   |
| Co(2)-O(2)#5        | 2.049(5)   | Co(2)-O(2)          | 2.049(5)   |
| Co(2)-O(3)#5        | 2.107(3)   | Co(2)-O(3)#1        | 2.107(3)   |
| Co(2)-O(3)#6        | 2.107(3)   | Co(2)-O(3)          | 2.107(3)   |
| O(1)-Co(1)-O(1)#1   | 180.0      | O(1)#1-Co(1)-O(4)#3 | 91.81(15)  |
| O(1)#1-Co(1)-O(4)#2 | 88.19(15)  | O(1)-Co(1)-O(4)#3   | 88.19(15)  |
| O(1)-Co(1)-O(4)#2   | 91.81(15)  | O(1)#1-Co(1)-O(6)#1 | 85.71(17)  |
| O(1)#1-Co(1)-O(6)   | 94.29(17)  | O(1)-Co(1)-O(6)#1   | 94.29(17)  |
| O(1)-Co(1)-O(6)     | 85.71(17)  | O(4)#2-Co(1)-O(6)   | 94.23(15)  |
| O(4)#3-Co(1)-O(4)#2 | 180.0(3)   | O(4)#3-Co(1)-O(6)   | 85.77(15)  |
| O(4)#3-Co(1)-O(6)#1 | 94.23(15)  | O(4)#2-Co(1)-O(6)#1 | 85.77(15)  |
| O(6)-Co(1)-O(6)#1   | 180.0      | O(2)-Co(2)-O(3)     | 89.16(19)  |
| O(2)-Co(2)-O(4)#3   | 109.61(15) | O(2)-Co(2)-O(7)#1   | 92.00(18)  |
| O(2)-Co(2)-O(5)#3   | 169.47(15) | O(2)-Co(2)-N(1)#4   | 94.39(15)  |
| O(3)-Co(2)-O(4)#3   | 82.47(15)  | O(5)#3-Co(2)-O(4)#3 | 59.87(14)  |
| O(3)-Co(2)-O(5)#3   | 89.82(18)  | O(7)#1-Co(2)-O(3)   | 178.70(18) |
| O(7)#1-Co(2)-O(4)#3 | 96.59(15)  | O(7)#1-Co(2)-N(1)#4 | 89.02(15)  |
| O(7)#1-Co(2)-O(5)#3 | 88.93(17)  | N(1)#4-Co(2)-O(3)   | 91.46(15)  |
| N(1)#4-Co(2)-O(4)#3 | 155.06(14) | N(1)#4-Co(2)-O(5)#3 | 96.12(14)  |

Symmetrical codes: #1 -x+1,-y,-z; #2 -x+1/2,y-1/2,-z+1/2; #3 x+1/2,-y+1/2,z-1/2; #4 x,-y+1,z-1/2; #5 -x+1/2,y+1/2,-z+1/2; #6 x-1/2,-y+1/2,z+1/2; #7 x,-y+1,z+1/2 for **1**.

---

**2**

---

|                     |            |                      |            |
|---------------------|------------|----------------------|------------|
| Co(1)-O(1)          | 2.0263(9)  | Co(1)-O(2)           | 2.113(3)   |
| Co(1)-O(2)#1        | 2.113(3)   | Co(1)-O(3)#2         | 2.077(3)   |
| Co(1)-O(3)#3        | 2.077(3)   | Co(1)-N(1)#4         | 2.182(5)   |
| O(1)-Co(1)-O(2)     | 93.18(9)   | O(1)-Co(1)-O(2)#1    | 93.18(9)   |
| O(1)-Co(1)-O(3)#2   | 91.23(9)   | O(1)-Co(1)-O(3)#3    | 91.23(9)   |
| O(2)-Co(1)-O(2)#1   | 173.65(19) | O(1)-Co(1)-N(1)#4    | 180.0      |
| O(2)-Co(1)-N(1)#4   | 86.82(9)   | O(2)#1-Co(1)-N(1)#4  | 86.82(9)   |
| O(3)#2-Co(1)-O(2)   | 86.52(16)  | O(3)#3-Co(1)-O(2)    | 93.35(16)  |
| O(3)#2-Co(1)-O(2)#1 | 93.35(16)  | O(3)#3-Co(1)-O(2)#1  | 86.52(16)  |
| O(3)#3-Co(1)-N(1)#4 | 88.77(9)   | O(3)#2-Co(1)-O(3)#3  | 177.53(19) |
| O(3)#2-Co(1)-N(1)#4 | 88.76(9)   | Co(1)#2-O(1)-Co(1)#6 | 120.0      |

Symmetrical codes: #1  $y-1/3, x+1/3, -z+5/6$ ; #2  $-y+1, x-y+1, z$ ; #3  $x-y+2/3, -y+4/3, -z+5/6$ ; #4  $y, -x+y+1, -z+1$ ; #5  $-x+4/3, -x+y+2/3, -z+7/6$ ; #6  $-x+y, -x+1, z$ ; #7  $x-y+1, x, -z+1$  for **2**.

---

**3**

---

|                     |           |                     |            |
|---------------------|-----------|---------------------|------------|
| Co(1)-O(1)          | 2.028(4)  | Co(2)-O(2)          | 2.045(4)   |
| Co(1)-O(1)#1        | 2.028(4)  | Co(2)-O(3)          | 2.090(4)   |
| Co(1)-O(4)#2        | 2.093(4)  | Co(2)-O(4)#3        | 2.202(4)   |
| Co(1)-O(4)#3        | 2.093(4)  | Co(2)-O(5)#3        | 2.164(4)   |
| Co(1)-O(6)          | 2.124(4)  | Co(2)-O(7)#1        | 2.062(4)   |
| Co(1)-O(6)#1        | 2.124(4)  | Co(2)-N(1)#4        | 2.076(4)   |
| O(1)-Co(1)-O(1)#1   | 180       | O(2)-Co(2)-O(3)     | 89.16(19)  |
| O(1)#1-Co(1)-O(4)#3 | 91.81(15) | O(2)-Co(2)-O(4)#3   | 109.61(15) |
| O(1)#1-Co(1)-O(4)#2 | 88.19(15) | O(2)-Co(2)-O(5)#3   | 169.47(15) |
| O(1)-Co(1)-O(4)#3   | 88.19(15) | O(2)-Co(2)-O(7)#1   | 92.00(18)  |
| O(1)-Co(1)-O(4)#2   | 91.81(15) | O(2)-Co(2)-N(1)#4   | 94.39(15)  |
| O(1)#1-Co(1)-O(6)   | 94.29(17) | O(3)-Co(2)-O(4)#3   | 82.47(15)  |
| O(1)#1-Co(1)-O(6)#1 | 85.71(17) | O(3)-Co(2)-O(5)#3   | 89.82(18)  |
| O(1)-Co(1)-O(6)#1   | 94.29(17) | O(5)#3-Co(2)-O(4)#3 | 59.87(14)  |
| O(1)-Co(1)-O(6)     | 85.71(17) | O(7)#1-Co(2)-O(3)   | 178.70(18) |
| O(4)#3-Co(1)-O(4)#2 | 180.0(3)  | O(7)#1-Co(2)-O(4)#3 | 96.59(15)  |
| O(4)#2-Co(1)-O(6)   | 94.23(15) | O(7)#1-Co(2)-O(5)#3 | 88.93(17)  |
| O(4)#3-Co(1)-O(6)   | 85.77(15) | O(7)#1-Co(2)-N(1)#4 | 89.02(15)  |
| O(4)#3-Co(1)-O(6)#1 | 94.23(15) | N(1)#4-Co(2)-O(3)   | 91.46(15)  |
| O(4)#2-Co(1)-O(6)#1 | 85.77(15) | N(1)#4-Co(2)-O(4)#3 | 155.06(14) |
| O(6)-Co(1)-O(6)#1   | 180       | N(1)#4-Co(2)-O(5)#3 | 96.12(14)  |

Symmetrical codes: #1  $-x+1, y, z$ ; #1  $-x+3/2, -y+3/2, -z+1$ ; #2  $-x+1, -y+1, -z$ ; #3  $x, -y+1, z$ ; #4  $-x+1, y, -z$ ; #5  $-x+2, -y+1, -z+1$ ; #6  $-x+2, y, -z+1$  for **3**.

---

**Table S2.** A comparison of various MOFs materials used for selective adsorption for C<sub>2</sub>H<sub>2</sub> and CO<sub>2</sub> over CH<sub>4</sub>.

| MOFs materials                                                                                                                                                                                                                     | IAST calculated selectivity                    |                                  | Ref.      |
|------------------------------------------------------------------------------------------------------------------------------------------------------------------------------------------------------------------------------------|------------------------------------------------|----------------------------------|-----------|
|                                                                                                                                                                                                                                    | C <sub>2</sub> H <sub>2</sub> /CH <sub>4</sub> | CO <sub>2</sub> /CH <sub>4</sub> |           |
| [(CH <sub>3</sub> ) <sub>2</sub> NH <sub>2</sub> ][Zn <sub>1.5</sub> (μ <sub>3</sub> -O) <sub>0.5</sub> (F-tzba) <sub>1.25</sub> (bpy) <sub>0.25</sub> (μ <sub>2</sub> -F) <sub>0.5</sub> ] $\cdot$ 2DMF $\cdot$ 2H <sub>2</sub> O | 14.4                                           | 4.2                              | 23a       |
| {[(Me <sub>2</sub> NH <sub>2</sub> ) <sub>0.5</sub> ][Cu <sub>0.75</sub> (L) <sub>0.5</sub> (DMA) <sub>0.375</sub> ] $\cdot$ H <sub>2</sub> O} <sub>n</sub>                                                                        |                                                | 8.3                              | 6a        |
| {[Cu <sub>4</sub> (L) <sub>2</sub> (H <sub>2</sub> O) <sub>4</sub> ] $\cdot$ 4DMF $\cdot$ 8H <sub>2</sub> O} <sub>n</sub>                                                                                                          |                                                | 3.2                              | 6a        |
| {[Cu <sub>4</sub> (L) <sub>2</sub> (ATZ) <sub>2</sub> (H <sub>2</sub> O)] $\cdot$ 5DMF $\cdot$ 5H <sub>2</sub> O} <sub>n</sub>                                                                                                     |                                                | 7.2                              | 6a        |
| ZIF-25                                                                                                                                                                                                                             |                                                | 2.5                              | 16a       |
| NOTT-202a                                                                                                                                                                                                                          |                                                | 1.4                              | 23b       |
| ZJNU-63                                                                                                                                                                                                                            | 13.1                                           | 3.5                              | 24a       |
| Sc-ABTC                                                                                                                                                                                                                            | 14.7                                           |                                  | 24b       |
| {[Co <sub>6</sub> (μ <sub>3</sub> -OH) <sub>4</sub> (Ina) <sub>8</sub> ](H <sub>2</sub> O) <sub>10</sub> (DMA) <sub>2</sub> } <sub>n</sub>                                                                                         | 9.6                                            |                                  | 23c       |
| ZJU-16a                                                                                                                                                                                                                            | 7.5                                            |                                  | 24c       |
| MOF-505                                                                                                                                                                                                                            | ~8.9                                           |                                  | 24d       |
| NOTT-108                                                                                                                                                                                                                           | ~6.3                                           |                                  | 24d       |
| HNUST-2                                                                                                                                                                                                                            | ~4.3                                           |                                  | 24d       |
| <b>MOF-2</b>                                                                                                                                                                                                                       | 20.1                                           | 7.6                              | This work |
| <b>MOF-3</b>                                                                                                                                                                                                                       | 12.1                                           | 4.1                              | This work |

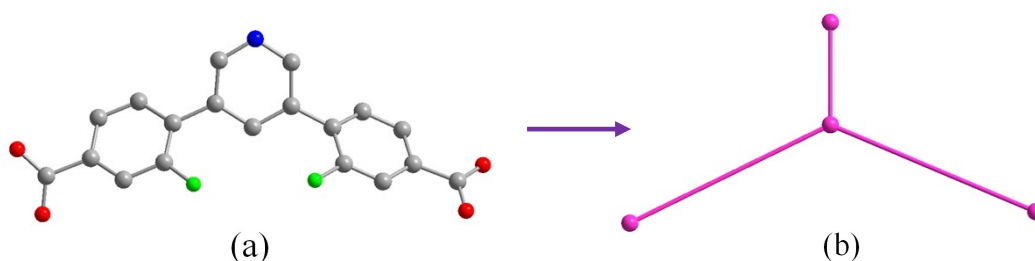

**Figure S1.** The L<sup>2</sup>- ligand viewed as three kinds of 3-c nodes.

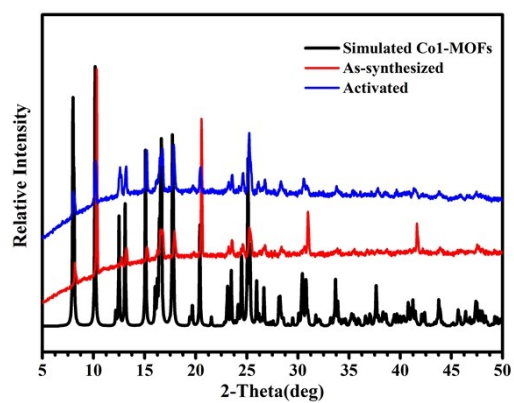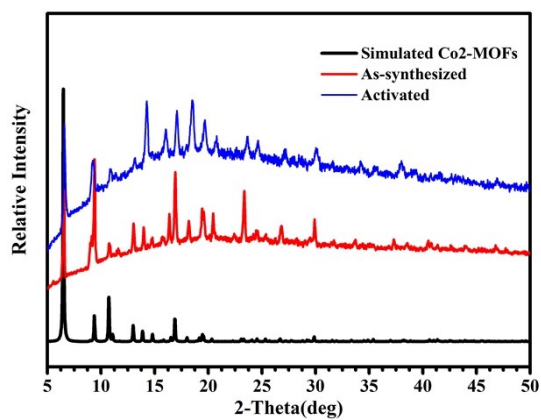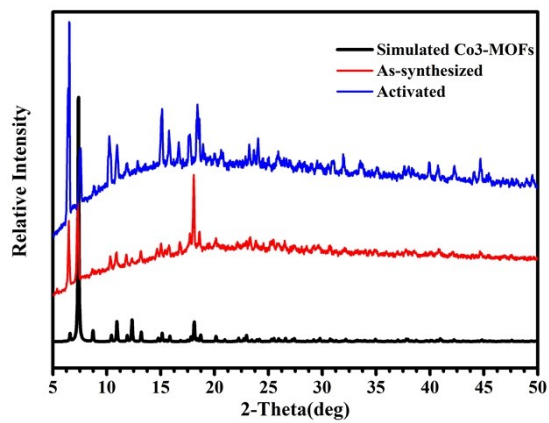

**Figure S2.** PXRD patterns for **1-3**: simulated, as-synthesized and activated samples.

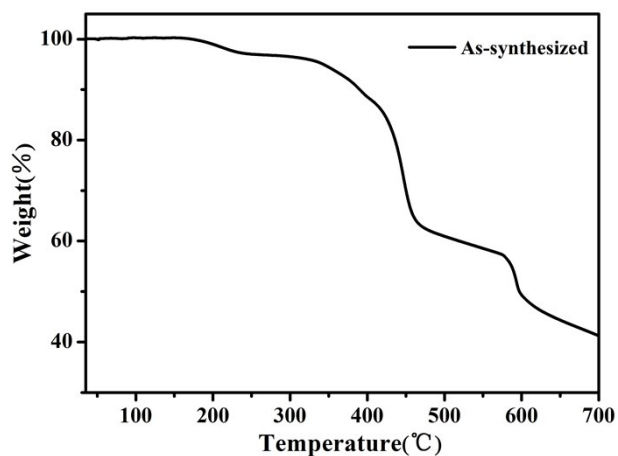

**Figure S3.** TGA for 1: as-synthesized samples.

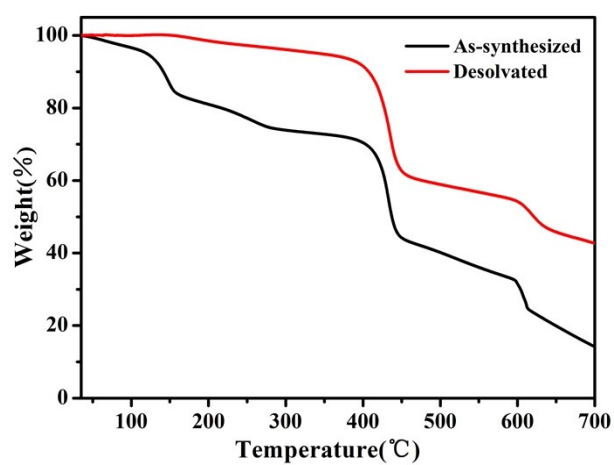

**Figure S4.** TGA for 2: as-synthesized and desolvated samples.

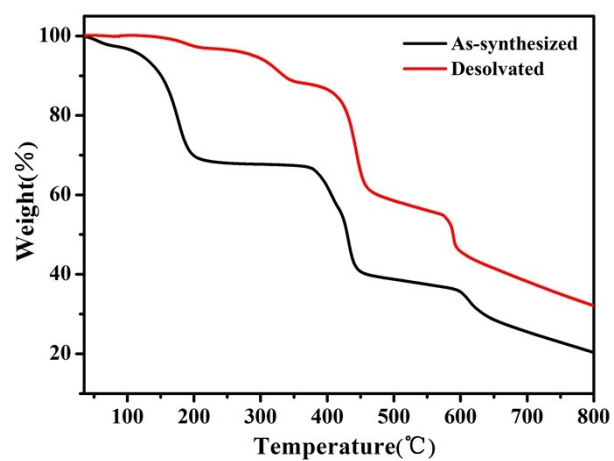

**Figure S5.** TGA for 3: as-synthesized and desolvated samples.

### IAST adsorption selectivity calculation

The experimental isotherm data for pure CO<sub>2</sub>, CH<sub>4</sub> and N<sub>2</sub> (measured at 298 K) were

fitted using a Langmuir-Freundlich (L-F) model.

$$q = \frac{a * b * p^c}{1 + b * p^c}$$

Where  $q$  and  $p$  are adsorbed amounts and pressures of component  $i$ , respectively. The adsorption selectivities for binary mixtures of CO<sub>2</sub>/CH<sub>4</sub> at 273 and 298 K and C<sub>2</sub>H<sub>2</sub>/CH<sub>4</sub> at 298 K, defined by

$$S_{ads} = (q_1 / q_2) / (p_1 / p_2)$$

Where  $q_i$  is the amount of  $i$  adsorbed and  $p_i$  is the partial pressure of  $i$  in the mixture.

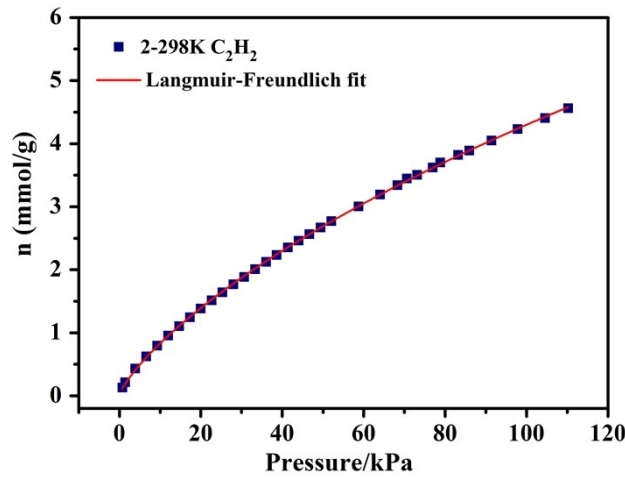

(a)

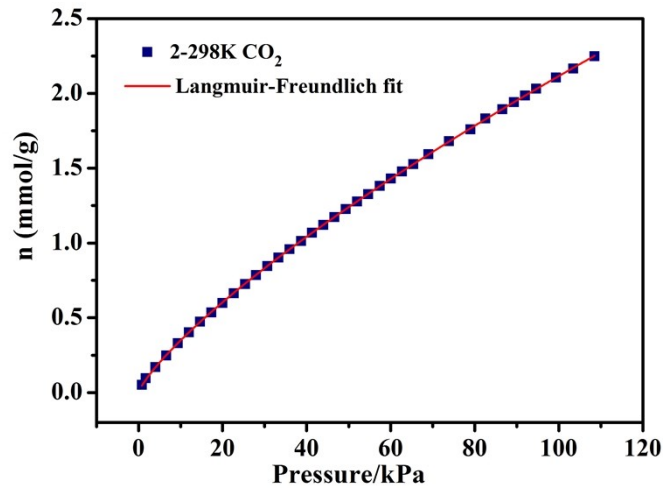

(b)

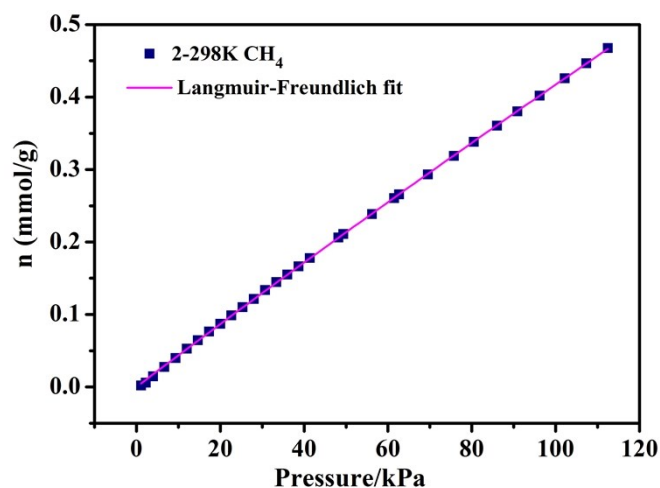

(c)

**Figure S6.** (a)  $C_2H_2$  adsorption isotherms of **2** at 298 K with fitting by L-F model:  $a = 26.95667$ ,  $b = 0.00533$ ,  $c = 0.22434$ ,  $\chi^2 = 2.00616E-4$ ,  $R^2 = 0.99988$ ; (b)  $CO_2$  adsorption isotherms of **2** at 298 K with fitting by L-F model:  $a = 40.39902$ ,  $b = 0.00136$ ,  $c = 0.19633$ ,  $\chi^2 = 1.05449E-5$ ,  $R^2 = 0.99997$ ; (c)  $CH_4$  adsorption isotherms of **2** at 298 K with fitting by L-F model:  $a = 9.68722$ ,  $b = 4.55244$ ,  $c = 0.00252$ ,  $\chi^2 = 1.70764E-6$ ,  $R^2 = 0.99992$ .

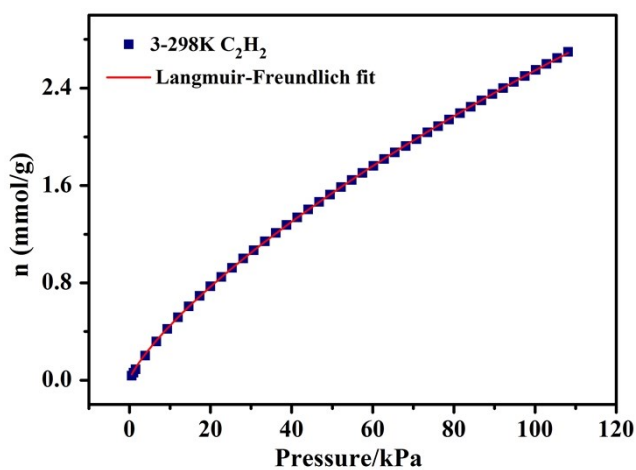

(a)

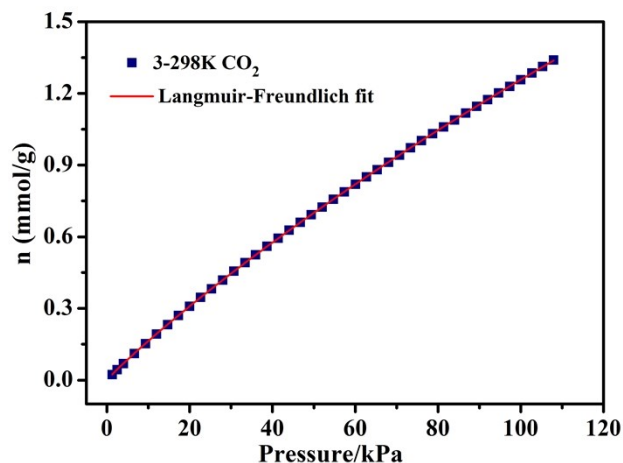

(b)

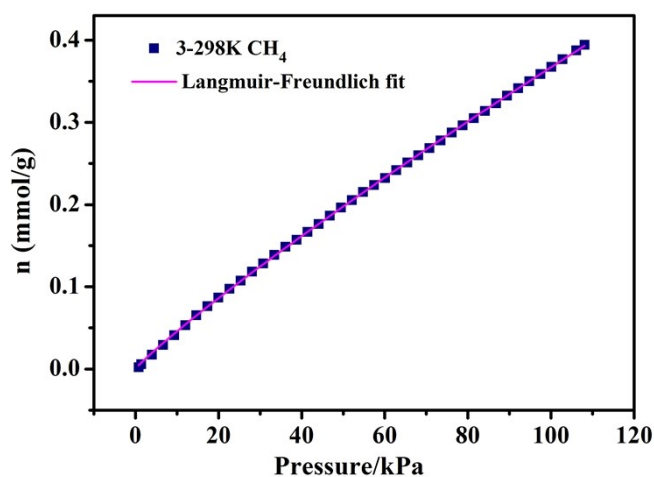

(c)

**Figure S7.** (a)  $C_2H_2$  adsorption isotherms of **3** at 298 K with fitting by L-F model:  $a = 24.84213$ ,  $b = 0.00331$ ,  $c = 0.1999$ ,  $\chi^2 = 3.31489E-5$ ,  $R^2 = 0.99996$ ; (b)  $CO_2$  adsorption isotherms of **3** at 298 K with fitting by L-F model:  $a = 9.26861$ ,  $b = 0.00205$ ,  $c = 0.05827$ ,  $\chi^2 = 5.25549E-7$ ,  $R^2 = 1$ ; (c)  $CH_4$  adsorption isotherms of **3** at 298 K with fitting by L-F model:  $a = 9.70998$ ,  $b = 5.72028E-4$ ,  $c = 0.08157$ ,  $\chi^2 = 1.19325E-6$ ,  $R^2 = 0.9999$ .

### Calculation of sorption heat for $C_2H_2$ and $CO_2$ uptakes using Virial 2 model

The above equation was applied to fit the combined  $C_2H_2$  and  $CO_2$  and isotherm data for desolvated **2a** and **3a** at 273 and 298 K, where  $P$  is the pressure,  $N$  is the adsorbed amount,  $T$  is the temperature,  $a_i$  and  $b_i$  are virial coefficients, and  $m$  and  $n$  are the number of coefficients used to describe the isotherms.  $Q_{st}$  is the coverage-dependent



enthalpy of adsorption and  $R$  is the universal gas constant.

$$\ln P = \ln N + 1/T \sum_{i=0}^m aiN^i + \sum_{i=0}^n biN^i Q_{st} = -R \sum_{i=0}^m aiN^i$$

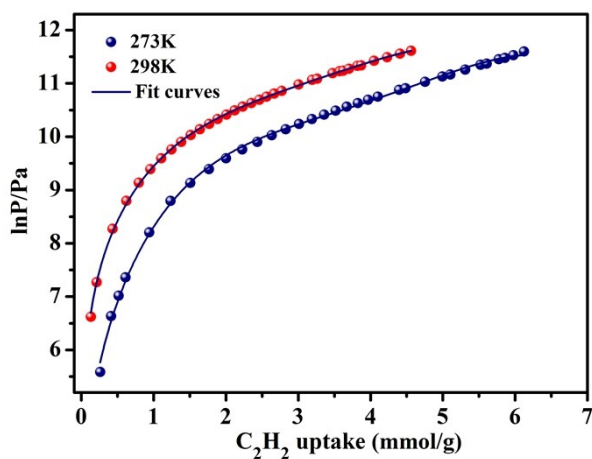

(a)

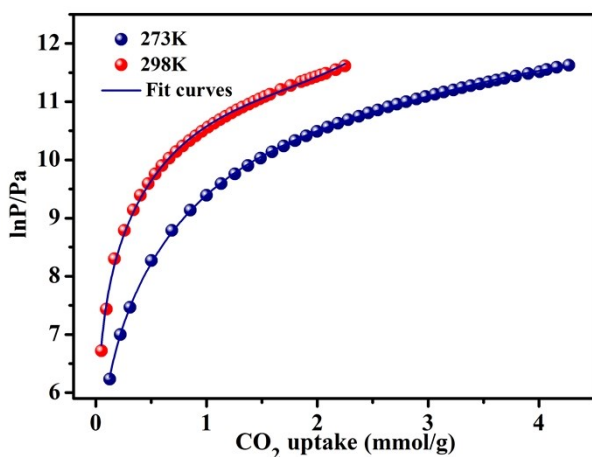

(b)

**Figure S8.** (a) Virial analysis of the  $C_2H_2$  adsorption data at 298 K and 273 K for **2**. Fitting results:  $a_0 = -6794.18492$ ,  $a_1 = 4376.90846$ ,  $a_2 = -1453.97443$ ,  $a_3 = 172.82127$ ,  $a_4 = -3.47683$ ,  $\chi^2 = 0.00618$ ,  $R^2 = 0.9991$ ; (b) Virial analysis of the  $CO_2$  adsorption data at 298 K and 273 K for **2**. Fitting results:  $a_0 = -5675.46522$ ,  $a_1 = 1030.50188$ ,  $a_2 = 753.4363$ ,  $a_3 = -343.85346$ ,  $a_4 = -5.75955$ ,  $\chi^2 = 8.6614E-4$ ,  $R^2 = 0.9994$ .

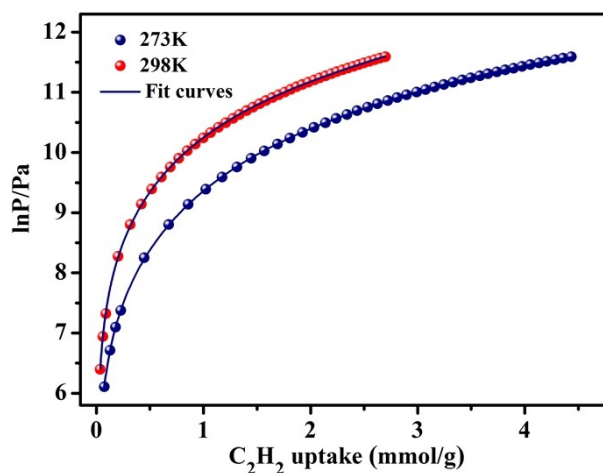

(a)

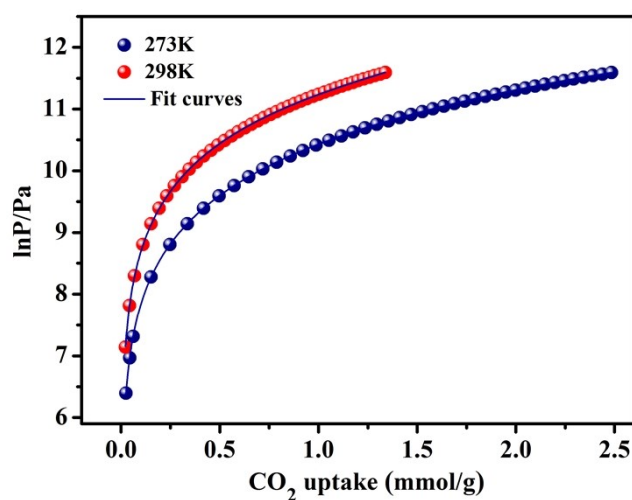

(b)

**Figure S9.** (a) Virial analysis of the  $C_2H_2$  adsorption data at 298 K and 273 K for **3**. Fitting results:  $a_0 = -3438.80266$ ,  $a_1 = 642.98654$ ,  $a_2 = -90.36757$ ,  $a_3 = -0.09836$ ,  $a_4 = -1.78337$ ,  $\chi^2 = 5.28472E-5$ ,  $R^2 = 0.99997$ ; (b) Virial analysis of the  $CO_2$  adsorption data at 298 K and 273 K for **3**. Fitting results:  $a_0 = -2772.91188$ ,  $a_1 = -143.3409$ ,  $a_2 = 578.72905$ ,  $a_3 = -280.20604$ ,  $a_4 = -3.66184$ ,  $\chi^2 = 1.64237E-5$ ,  $R^2 = 0.99999$ .

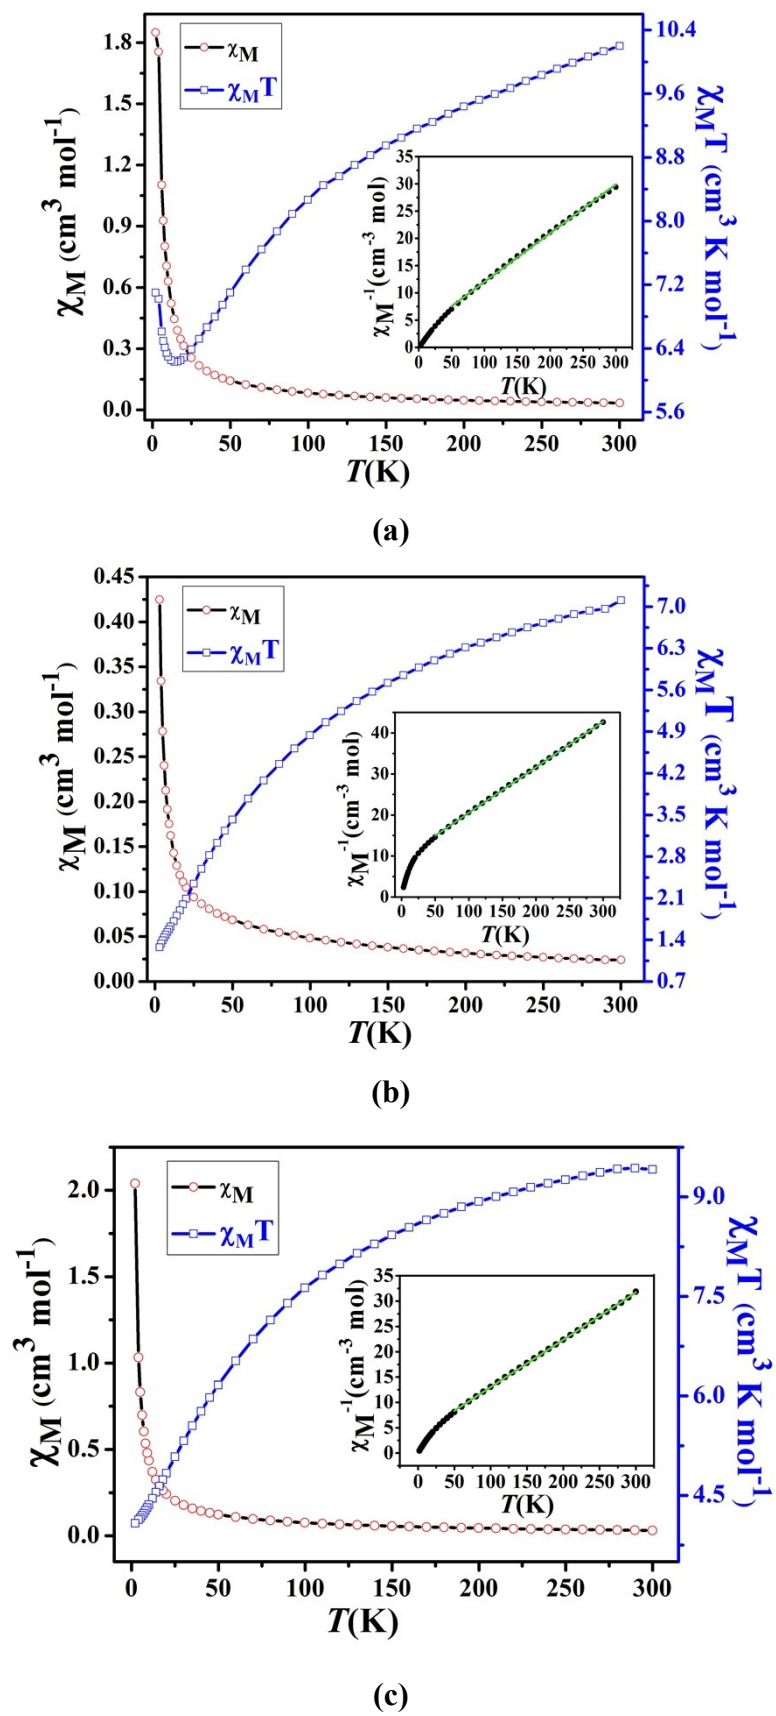

**Figure S10.** The  $\chi_M T$ ,  $\chi_M$ , and  $1/\chi_M$  vs.  $T$  plots of **1-3 (a-c)**. The green line represents the best fit of the Curie-Weiss law.

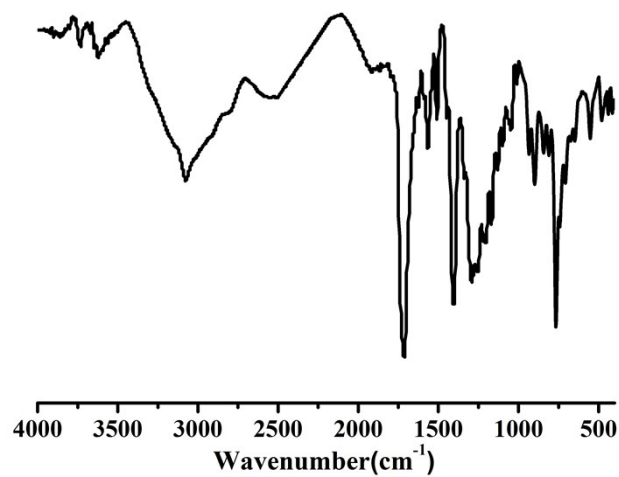

(a)

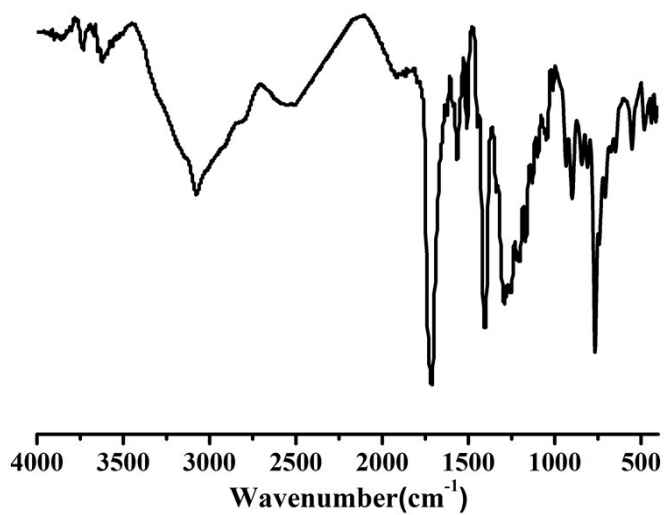

(b)

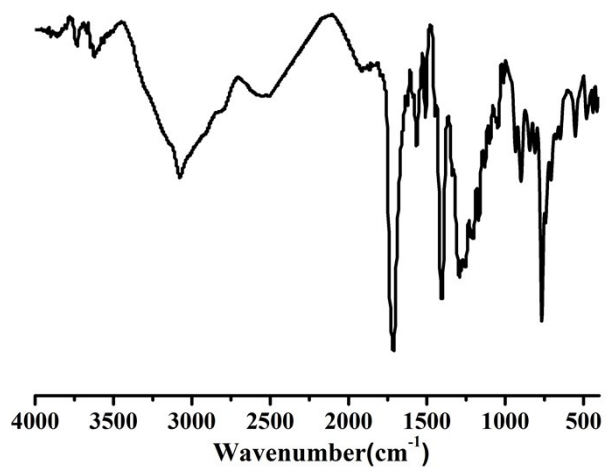

(c)

**Figure S11.** IR spectra of the as-synthesized 1-3 in (a-c).
